# Supplementary material for: Circadian and wake-dependent changes in human plasma polar metabolites during prolonged wakefulness: A preliminary analysis
Source: PubMed Central journal article supplement (PMC6418225; doi:10.1038/s41598-019-40353-8), 2019-03-14
Supplement: 41598_2019_40353_MOESM1_ESM.pdf [file 41598_2019_40353_MOESM1_ESM.pdf]

## Supplementary information to Grant et al.

### **Circadian and wake-dependent changes in human plasma polar metabolites during prolonged wakefulness: A preliminary analysis**

Leilah K. Grant, Suzanne Ftouni, Brunda Nijagal, David P. De Souza, Dedreia Tull, Malcolm J. McConville, Shantha M. W. Rajaratnam, Steven W. Lockley, Clare Anderson

The following four tables are provided in xlsx format.

**Table S1.** Model estimates for rhythmic metabolites from the targeted matrix. The p-value, amplitude (Am) and acrophase (AcPh) for significant metabolites are shown for individual participants (A-M), and group-level analyses. Metabolite names and classes are given in the first two columns. The number of participants in which a single metabolite is significant is shown in column AP. Metabolites shown in bold demonstrated a combined rhythmic and linear pattern of change.

**Table S2.** Model estimates for linear metabolites from the targeted matrix. The p-value and slope for significant metabolites are shown for individual participants (A-M), and group-level analyses. Metabolite names and classes are given in the first two columns. The number of participants in which a single metabolite is significant is shown in column AC. Metabolites shown in bold demonstrated a combined rhythmic and linear pattern of change.

**Table S3.** Model estimates for rhythmic metabolites from the untargeted matrix. The p-value, amplitude (Am) and acrophase (AcPh) for significant metabolites are shown for individual participants (A-M), and group-level analyses. The number of participants in which a single metabolite is significant is shown in column AO. Metabolites shown in bold demonstrated a combined rhythmic and linear pattern of change.

**Table S4.** Model estimates for linear metabolites from the untargeted matrix. The p-value and slope for significant metabolites are shown for individual participants (A-M), and group-level analyses. The number of participants in which a single metabolite is significant is shown in column AB. Metabolites shown in bold demonstrated a combined rhythmic and linear pattern of change.

**Table S5.** Raw area count data from the untargeted matrix, which includes metabolite features represented in the targeted matrix, for all participants (A-M, and participant N excluded from primary analysis) at times 02-38 hours since wake, PBQCs and PQCs.

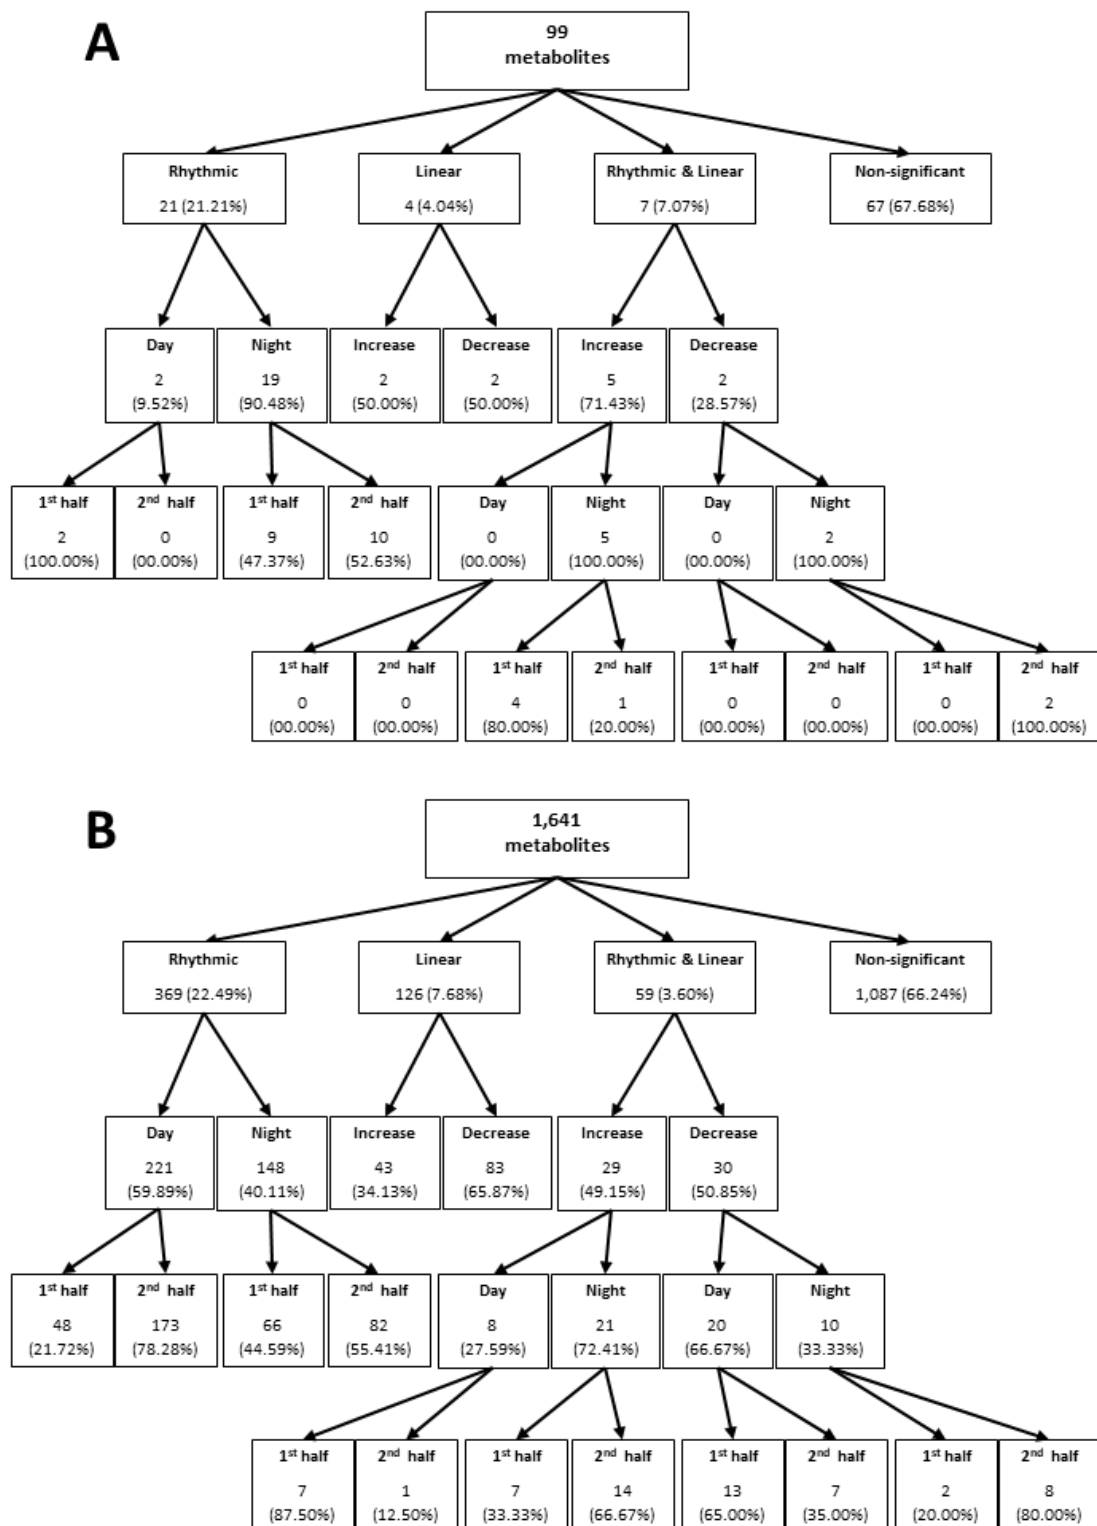

**Figure S1.** Results of the group-level analyses for the (A) targeted and (B) untargeted matrices showing the proportion of rhythmic, linear, combined rhythmic and linear, and non-significant metabolites. Rhythmic metabolites are further classified by acrophase (day/night and 1<sup>st</sup>/2<sup>nd</sup> half of day or night), and linear metabolites are classified according to the direction of linear change (increasing or decreasing).

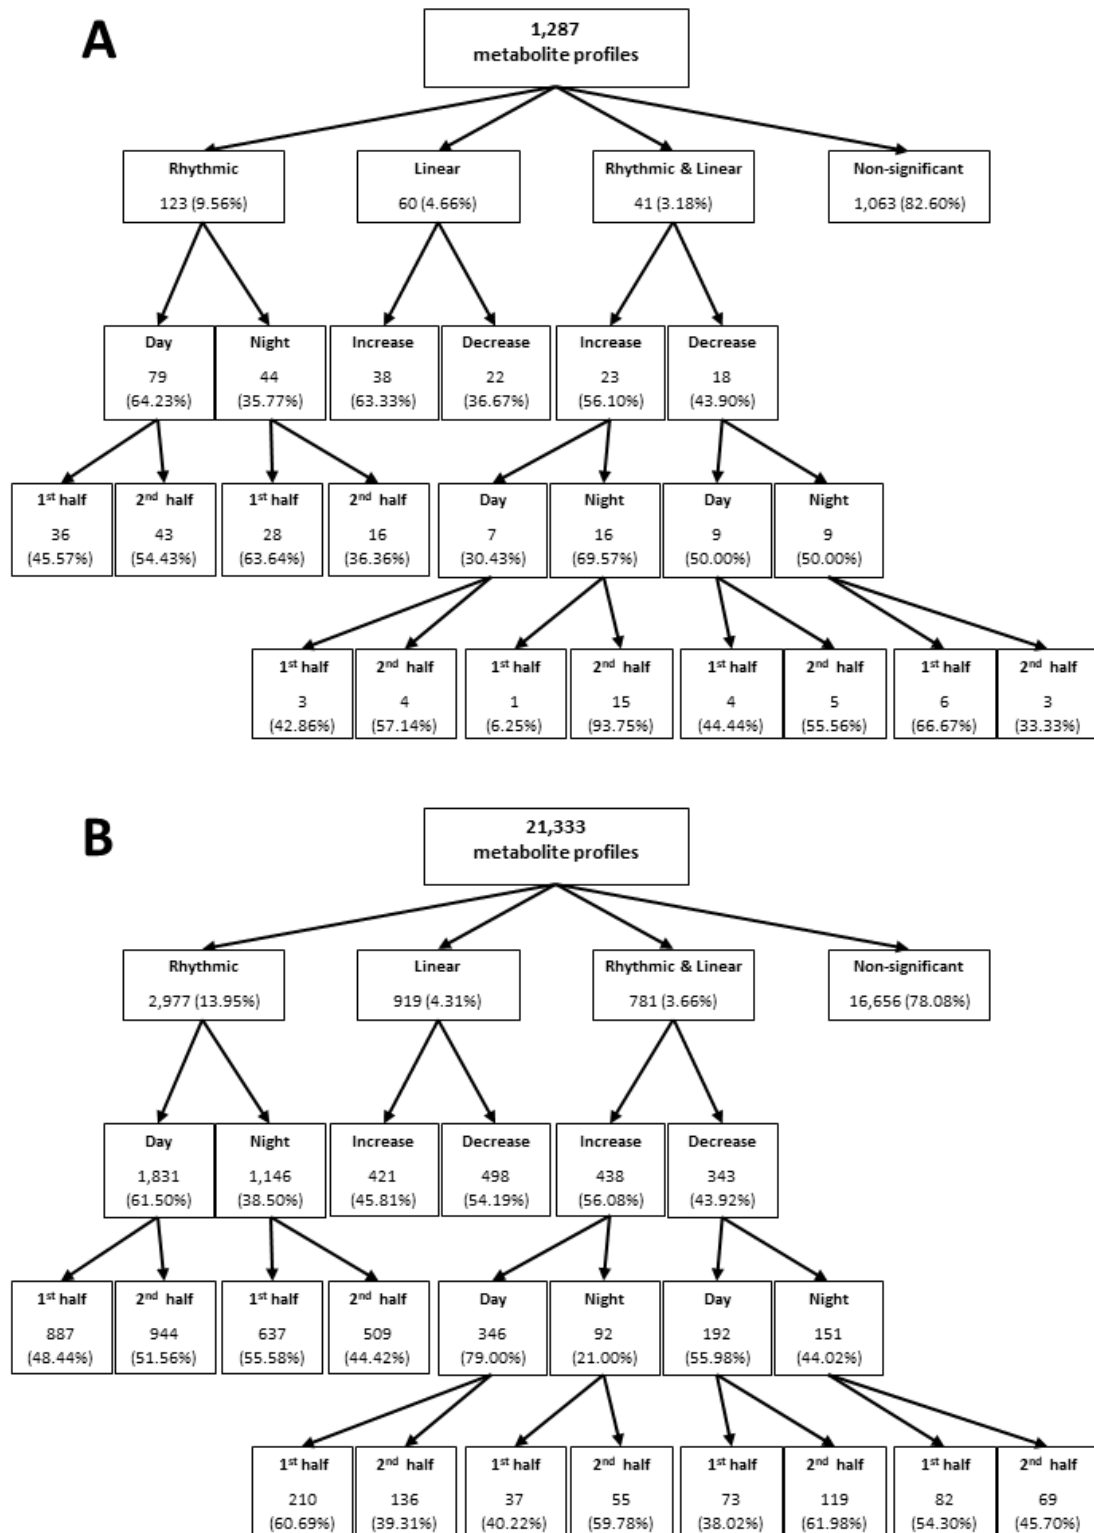

**Figure S2.** Results of the individual-level analyses for the (A) targeted and (B) untargeted matrices showing the proportion of rhythmic, linear, combined rhythmic and linear, and non-significant metabolite profiles. Rhythmic metabolites are further classified by acrophase (day/night and 1<sup>st</sup>/2<sup>nd</sup> half of day or night), and linear metabolites are classified according to the direction of linear change (increasing or decreasing).

**Table S6.** Results of the pathway enrichment analysis of identified group-rhythmic (including combined rhythmic and linear) metabolites from the targeted matrix. The table shows the pathway involved, the total number of metabolites in that pathway, the number of significantly rhythmic metabolites in that pathway and the raw and false discovery rate (FDR) adjusted p values. Results were generated from MetaboAnalyst 3.0.

| <b>Pathway</b>                             | <b>Total<br/>metabs.<br/>in<br/>pathway</b> | <b># sig.<br/>metabs.<br/>in<br/>pathway</b> | <b>Raw p</b> | <b>FDR<br/>adjusted<br/>p</b> |
|--------------------------------------------|---------------------------------------------|----------------------------------------------|--------------|-------------------------------|
| Phenylalanine and tyrosine metabolism      | 13                                          | 4                                            | 0.000623     | 0.0492                        |
| Urea cycle                                 | 20                                          | 4                                            | 0.00358      | 0.141                         |
| Aspartate metabolism                       | 12                                          | 3                                            | 0.00633      | 0.167                         |
| Arginine and proline metabolism            | 26                                          | 4                                            | 0.00957      | 0.189                         |
| Citric acid cycle                          | 23                                          | 3                                            | 0.0396       | 0.625                         |
| Starch and sucrose metabolism              | 14                                          | 2                                            | 0.0789       | 1                             |
| Valine, leucine and isoleucine degradation | 36                                          | 3                                            | 0.119        | 1                             |
| Biotin metabolism                          | 4                                           | 1                                            | 0.13         | 1                             |
| Inositol metabolism                        | 19                                          | 2                                            | 0.134        | 1                             |
| Tyrosine metabolism                        | 38                                          | 3                                            | 0.134        | 1                             |
| Catecholamine biosynthesis                 | 5                                           | 1                                            | 0.159        | 1                             |
| Methionine metabolism                      | 24                                          | 2                                            | 0.195        | 1                             |
| Taurine and hypotaurine metabolism         | 7                                           | 1                                            | 0.216        | 1                             |
| Nucleotide sugars metabolism               | 9                                           | 1                                            | 0.269        | 1                             |
| Pantothenate and CoA biosynthesis          | 10                                          | 1                                            | 0.294        | 1                             |
| Betaine metabolism                         | 10                                          | 1                                            | 0.294        | 1                             |
| Beta-alanine metabolism                    | 13                                          | 1                                            | 0.365        | 1                             |
| Lysine degradation                         | 13                                          | 1                                            | 0.365        | 1                             |
| Mitochondrial electron transport chain     | 15                                          | 1                                            | 0.408        | 1                             |
| Ammonia recycling                          | 18                                          | 1                                            | 0.467        | 1                             |
| Propanoate metabolism                      | 18                                          | 1                                            | 0.467        | 1                             |
| Pentose phosphate pathway                  | 18                                          | 1                                            | 0.467        | 1                             |
| Glycolysis                                 | 21                                          | 1                                            | 0.521        | 1                             |
| Galactose metabolism                       | 25                                          | 1                                            | 0.585        | 1                             |
| Glycine, serine and threonine metabolism   | 26                                          | 1                                            | 0.599        | 1                             |
| Gluconeogenesis                            | 27                                          | 1                                            | 0.613        | 1                             |
| Tryptophan metabolism                      | 34                                          | 1                                            | 0.699        | 1                             |
| Pyrimidine metabolism                      | 36                                          | 1                                            | 0.72         | 1                             |
| Purine metabolism                          | 45                                          | 1                                            | 0.798        | 1                             |

### Metabolite Sets Enrichment Overview

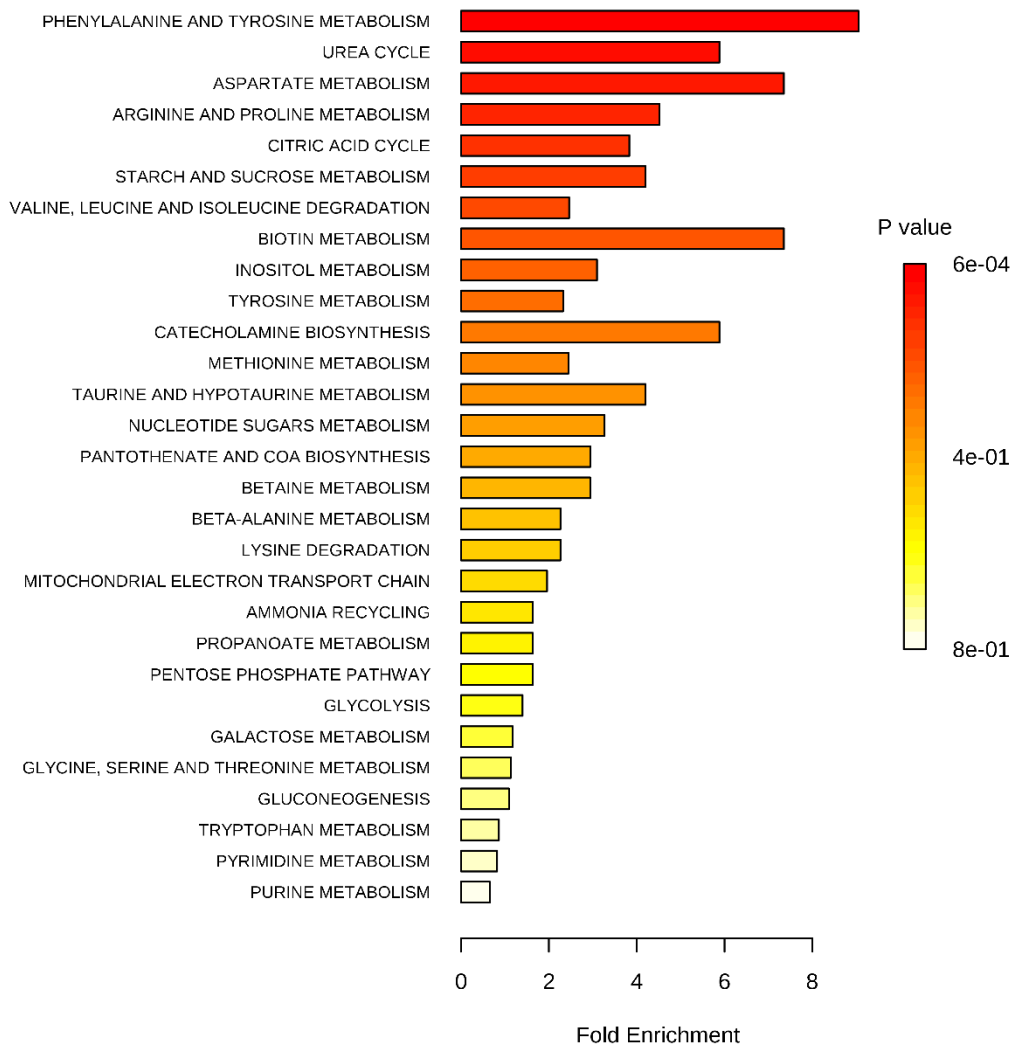

**Figure S3.** Pathway enrichment analysis of metabolites that were significantly rhythmic (including combined rhythmic and linear metabolites) in group-level analyses. Unadjusted p-values are represented. Generated by MetaboAnalyst 3.0.

**Table S7.** Results of the pathway enrichment analysis of identified group-linear (including combined rhythmic and linear) metabolites from the targeted matrix. The table shows the pathway involved, the total number of metabolites in that pathway, the number of significantly linear metabolites in that pathway and the raw and false discovery rate (FDR) adjusted p values. Results were generated from MetaboAnalyst 3.0.

| <b>Pathway</b>                           | <b>Total<br/>metabs.<br/>in<br/>pathway</b> | <b># sig.<br/>metabs.<br/>in<br/>pathway</b> | <b>Raw p</b> | <b>FDR<br/>adjusted<br/>p</b> |
|------------------------------------------|---------------------------------------------|----------------------------------------------|--------------|-------------------------------|
| Arginine and proline metabolism          | 26                                          | 2                                            | 0.0443       | 1                             |
| Biotin metabolism                        | 4                                           | 1                                            | 0.0525       | 1                             |
| Taurine and hypotaurine metabolism       | 7                                           | 1                                            | 0.0902       | 1                             |
| Pantothenate and CoA biosynthesis        | 10                                          | 1                                            | 0.127        | 1                             |
| Beta-alanine metabolism                  | 13                                          | 1                                            | 0.162        | 1                             |
| Phenylalanine and tyrosine metabolism    | 13                                          | 1                                            | 0.162        | 1                             |
| Lysine degradation                       | 13                                          | 1                                            | 0.162        | 1                             |
| Urea cycle                               | 20                                          | 1                                            | 0.238        | 1                             |
| Citric acid cycle                        | 23                                          | 1                                            | 0.269        | 1                             |
| Glycine, serine and threonine metabolism | 26                                          | 1                                            | 0.299        | 1                             |
| Pyrimidine metabolism                    | 36                                          | 1                                            | 0.39         | 1                             |

### Metabolite Sets Enrichment Overview

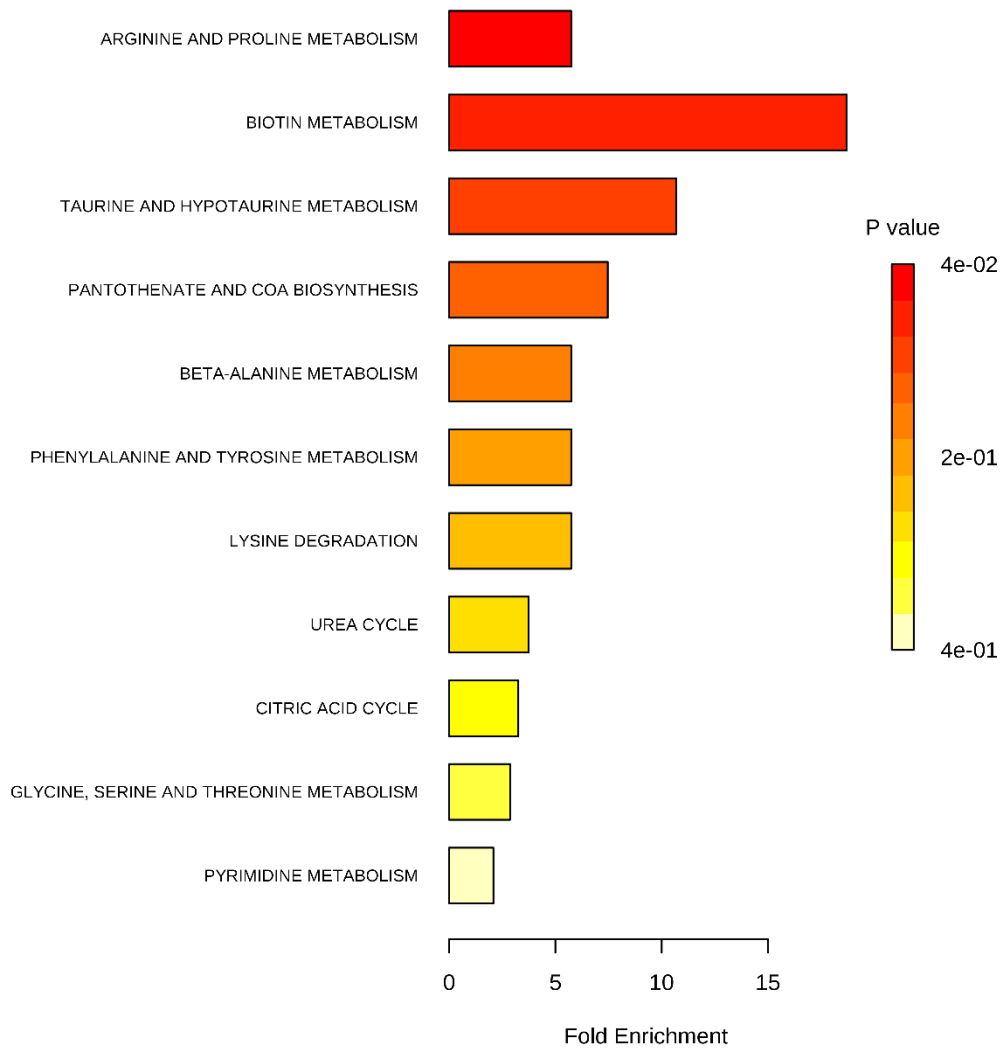

**Figure S4.** Pathway enrichment analysis of metabolites that were significantly linear (including combined rhythmic and linear metabolites) in group-level analyses. Unadjusted p-values are represented. Generated by MetaboAnalyst 3.0.

**Table S8.** Results of the pathway enrichment analysis of identified individual-level rhythmic (including combined rhythmic and linear) metabolites from the targeted matrix. The table shows the pathway involved, the total number of metabolites in that pathway, the number of significantly rhythmic metabolites in that pathway and the raw and false discovery rate (FDR) adjusted p values. Results were generated from MetaboAnalyst 3.0.

| <b>Pathway</b>                                                          | <b>Total<br/>metabs.<br/>in<br/>pathway</b> | <b># sig.<br/>metabs.<br/>in<br/>pathway</b> | <b>Raw p</b> | <b>FDR<br/>adjusted<br/>p</b> |
|-------------------------------------------------------------------------|---------------------------------------------|----------------------------------------------|--------------|-------------------------------|
| Citric acid cycle                                                       | 23                                          | 9                                            | 0.000107     | 0.00847                       |
| Urea cycle                                                              | 20                                          | 8                                            | 0.000226     | 0.00892                       |
| Methionine metabolism                                                   | 24                                          | 6                                            | 0.0201       | 0.371                         |
| Galactose metabolism                                                    | 25                                          | 6                                            | 0.0244       | 0.371                         |
| Phenylalanine and tyrosine metabolism                                   | 13                                          | 4                                            | 0.0275       | 0.371                         |
| Gluconeogenesis                                                         | 27                                          | 6                                            | 0.035        | 0.371                         |
| Starch and sucrose metabolism                                           | 14                                          | 4                                            | 0.0358       | 0.371                         |
| Nucleotide sugars metabolism                                            | 9                                           | 3                                            | 0.0453       | 0.371                         |
| RNA transcription                                                       | 9                                           | 3                                            | 0.0453       | 0.371                         |
| Biotin metabolism                                                       | 4                                           | 2                                            | 0.0469       | 0.371                         |
| Purine metabolism                                                       | 45                                          | 8                                            | 0.0536       | 0.385                         |
| Ammonia recycling                                                       | 18                                          | 4                                            | 0.0819       | 0.477                         |
| Glutamate metabolism                                                    | 18                                          | 4                                            | 0.0819       | 0.477                         |
| Arginine and proline metabolism                                         | 26                                          | 5                                            | 0.0905       | 0.477                         |
| Aspartate metabolism                                                    | 12                                          | 3                                            | 0.0964       | 0.477                         |
| Insulin signalling                                                      | 19                                          | 4                                            | 0.0965       | 0.477                         |
| Intracellular signalling through prostacyclin receptor and prostacyclin | 6                                           | 2                                            | 0.104        | 0.481                         |
| Beta-alanine metabolism                                                 | 13                                          | 3                                            | 0.117        | 0.487                         |
| Lysine degradation                                                      | 13                                          | 3                                            | 0.117        | 0.487                         |
| Glycolysis                                                              | 21                                          | 4                                            | 0.129        | 0.5                           |
| Taurine and hypotaurine metabolism                                      | 7                                           | 2                                            | 0.136        | 0.5                           |
| Beta oxidation of very long chain fatty acids                           | 14                                          | 3                                            | 0.139        | 0.5                           |
| Mitochondrial electron transport chain                                  | 15                                          | 3                                            | 0.163        | 0.559                         |
| Malate-aspartate shuttle                                                | 8                                           | 2                                            | 0.171        | 0.562                         |
| Propanoate metabolism                                                   | 18                                          | 3                                            | 0.239        | 0.703                         |
| Pentose phosphate pathway                                               | 18                                          | 3                                            | 0.239        | 0.703                         |
| Betaine metabolism                                                      | 10                                          | 2                                            | 0.243        | 0.703                         |
| Valine, leucine and isoleucine degradation                              | 36                                          | 5                                            | 0.249        | 0.703                         |



|                                                                                                                                                                                      |    |   |       |       |
|--------------------------------------------------------------------------------------------------------------------------------------------------------------------------------------|----|---|-------|-------|
| Inositol metabolism                                                                                                                                                                  | 19 | 3 | 0.266 | 0.724 |
| Pyruvate metabolism                                                                                                                                                                  | 20 | 3 | 0.293 | 0.771 |
| Glucose-alanine cycle                                                                                                                                                                | 12 | 2 | 0.317 | 0.808 |
| Intracellular signalling through FSH receptor and follicle stimulating hormone   intracellular signalling through LHCGR receptor and luteinizing hormone/choriogonadotropin          | 4  | 1 | 0.329 | 0.812 |
| Catecholamine biosynthesis                                                                                                                                                           | 5  | 1 | 0.393 | 0.817 |
| Excitatory neural signalling through 5-HTR 4 and serotonin   excitatory neural signalling through 5-HTR 7 and serotonin   excitatory neural signalling through 5-HTR 6 and serotonin | 5  | 1 | 0.393 | 0.817 |
| Corticotropin activation of cortisol production                                                                                                                                      | 5  | 1 | 0.393 | 0.817 |
| Vasopressin regulation of water homeostasis                                                                                                                                          | 5  | 1 | 0.393 | 0.817 |
| Intracellular signalling through histamine H2 receptor and histamine                                                                                                                 | 5  | 1 | 0.393 | 0.817 |
| Intracellular signalling through PGD2 receptor and prostaglandin D2                                                                                                                  | 5  | 1 | 0.393 | 0.817 |
| Pyrimidine metabolism                                                                                                                                                                | 36 | 4 | 0.45  | 0.89  |
| Alanine metabolism                                                                                                                                                                   | 6  | 1 | 0.451 | 0.89  |
| Intracellular signalling through adenosine receptor A2A and adenosine   intracellular signalling through adenosine receptor A2B and adenosine                                        | 7  | 1 | 0.503 | 0.97  |
| Butyrate metabolism                                                                                                                                                                  | 9  | 1 | 0.594 | 1     |
| Pantothenate and CoA biosynthesis                                                                                                                                                    | 10 | 1 | 0.633 | 1     |
| Ketone body metabolism                                                                                                                                                               | 10 | 1 | 0.633 | 1     |
| Tyrosine metabolism                                                                                                                                                                  | 38 | 3 | 0.718 | 1     |
| Glycine, serine and threonine metabolism                                                                                                                                             | 26 | 2 | 0.725 | 1     |
| Oxidation of branched chain fatty acids                                                                                                                                              | 14 | 1 | 0.755 | 1     |
| Sphingolipid metabolism                                                                                                                                                              | 15 | 1 | 0.778 | 1     |
| Amino sugar metabolism                                                                                                                                                               | 15 | 1 | 0.778 | 1     |
| Fructose and mannose degradation                                                                                                                                                     | 18 | 1 | 0.837 | 1     |
| Tryptophan metabolism                                                                                                                                                                | 34 | 2 | 0.851 | 1     |
| Fatty acid metabolism                                                                                                                                                                | 29 | 1 | 0.947 | 1     |
| Steroid biosynthesis                                                                                                                                                                 | 31 | 1 | 0.957 | 1     |
| Bile acid biosynthesis                                                                                                                                                               | 49 | 1 | 0.993 | 1     |

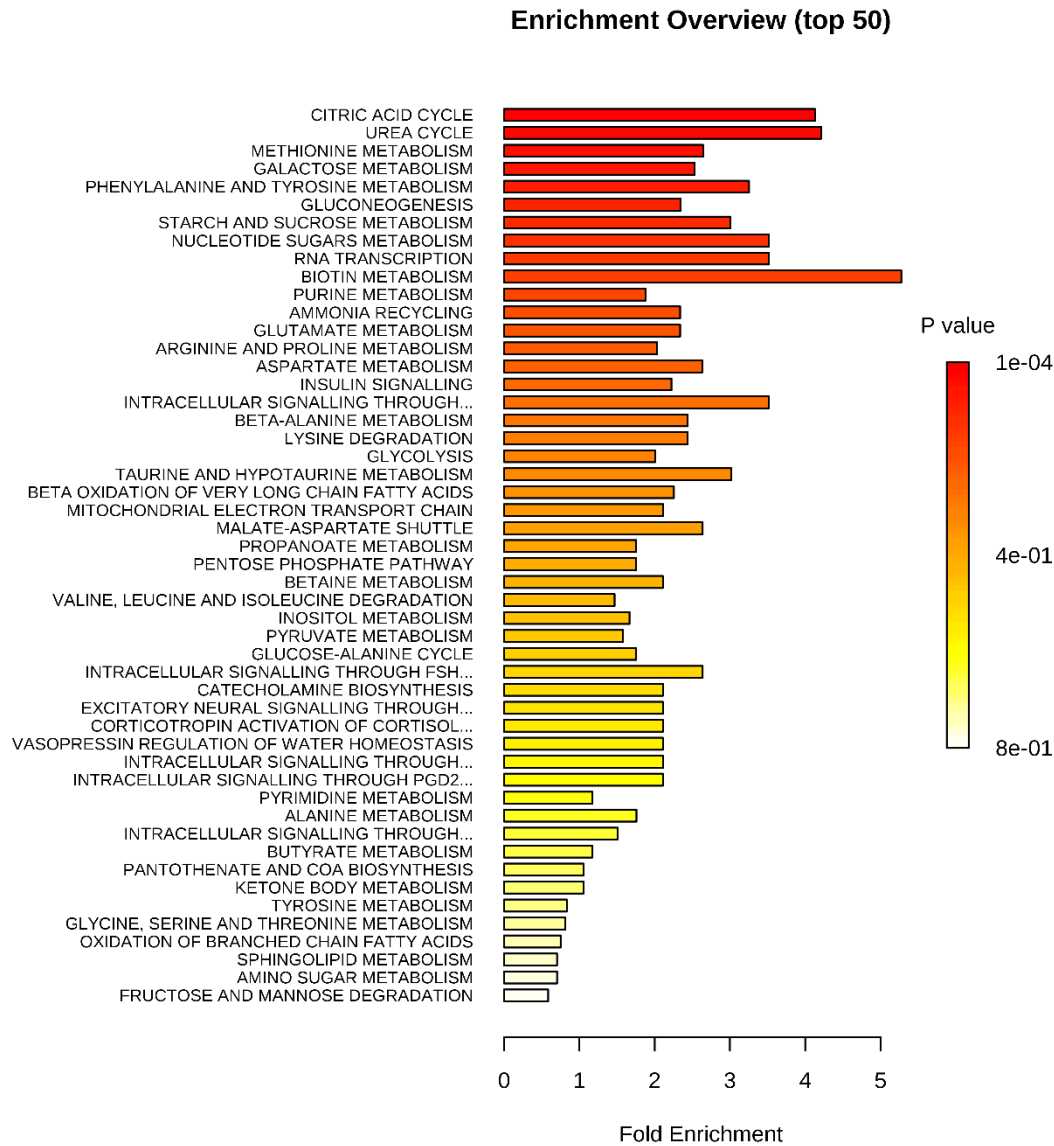

**Figure S5.** Pathway enrichment analysis of metabolites that were significantly rhythmic (including combined rhythmic and linear metabolites) in individual-level analyses. Unadjusted p-values are represented. Generated by MetaboAnalyst 3.0.

**Table S9.** Results of the pathway enrichment analysis of identified individual-level linear (including combined rhythmic and linear) metabolites from the targeted matrix. The table shows the pathway involved, the total number of metabolites in that pathway, the number of significantly linear metabolites in that pathway and the raw and false discovery rate (FDR) adjusted p values. Results were generated from MetaboAnalyst 3.0.

| <b>Pathway</b>                                | <b>Total<br/>metabs.<br/>in<br/>pathway</b> | <b># sig.<br/>metabs.<br/>in<br/>pathway</b> | <b>Raw p</b> | <b>FDR<br/>adjusted<br/>p</b> |
|-----------------------------------------------|---------------------------------------------|----------------------------------------------|--------------|-------------------------------|
| Citric acid cycle                             | 23                                          | 10                                           | 2.41E-06     | 0.00019                       |
| Urea cycle                                    | 20                                          | 8                                            | 5.83E-05     | 0.0023                        |
| Malate-aspartate shuttle                      | 8                                           | 4                                            | 0.00195      | 0.0337                        |
| Beta-alanine metabolism                       | 13                                          | 5                                            | 0.00207      | 0.0337                        |
| Galactose metabolism                          | 25                                          | 7                                            | 0.00213      | 0.0337                        |
| Alanine metabolism                            | 6                                           | 3                                            | 0.00793      | 0.104                         |
| Ammonia recycling                             | 18                                          | 5                                            | 0.0101       | 0.107                         |
| Glucose-alanine cycle                         | 12                                          | 4                                            | 0.0108       | 0.107                         |
| Arginine and proline metabolism               | 26                                          | 6                                            | 0.0126       | 0.11                          |
| Gluconeogenesis                               | 27                                          | 6                                            | 0.0152       | 0.12                          |
| Starch and sucrose metabolism                 | 14                                          | 4                                            | 0.0194       | 0.139                         |
| Nucleotide sugars metabolism                  | 9                                           | 3                                            | 0.028        | 0.184                         |
| Propanoate metabolism                         | 18                                          | 4                                            | 0.0467       | 0.263                         |
| Glutamate metabolism                          | 18                                          | 4                                            | 0.0467       | 0.263                         |
| Insulin signalling                            | 19                                          | 4                                            | 0.0557       | 0.293                         |
| Aspartate metabolism                          | 12                                          | 3                                            | 0.0618       | 0.305                         |
| Pyruvate metabolism                           | 20                                          | 4                                            | 0.0656       | 0.305                         |
| Phenylalanine and tyrosine metabolism         | 13                                          | 3                                            | 0.0759       | 0.318                         |
| Glycolysis                                    | 21                                          | 4                                            | 0.0764       | 0.318                         |
| Beta oxidation of very long chain fatty acids | 14                                          | 3                                            | 0.0914       | 0.361                         |
| Mitochondrial electron transport chain        | 15                                          | 3                                            | 0.108        | 0.406                         |
| Methionine metabolism                         | 24                                          | 4                                            | 0.114        | 0.408                         |
| Cysteine metabolism                           | 8                                           | 2                                            | 0.126        | 0.434                         |
| Pentose phosphate pathway                     | 18                                          | 3                                            | 0.164        | 0.539                         |
| Betaine metabolism                            | 10                                          | 2                                            | 0.183        | 0.559                         |
| Inositol metabolism                           | 19                                          | 3                                            | 0.184        | 0.559                         |
| Biotin metabolism                             | 4                                           | 1                                            | 0.281        | 0.822                         |
| Valine, leucine and isoleucine degradation    | 36                                          | 4                                            | 0.315        | 0.888                         |
| Catecholamine biosynthesis                    | 5                                           | 1                                            | 0.338        | 0.89                          |

|                                                                         |    |   |       |       |
|-------------------------------------------------------------------------|----|---|-------|-------|
| Glycine, serine and threonine metabolism                                | 26 | 3 | 0.338 | 0.89  |
| Intracellular signalling through prostacyclin receptor and prostacyclin | 6  | 1 | 0.391 | 0.995 |
| Taurine and hypotaurine metabolism                                      | 7  | 1 | 0.439 | 1     |
| Purine metabolism                                                       | 45 | 4 | 0.483 | 1     |
| Butyrate metabolism                                                     | 9  | 1 | 0.525 | 1     |
| Pyrimidine metabolism                                                   | 36 | 3 | 0.553 | 1     |
| Glutathione metabolism                                                  | 10 | 1 | 0.563 | 1     |
| Pantothenate and CoA biosynthesis                                       | 10 | 1 | 0.563 | 1     |
| Ketone body metabolism                                                  | 10 | 1 | 0.563 | 1     |
| Tyrosine metabolism                                                     | 38 | 3 | 0.591 | 1     |
| Histidine metabolism                                                    | 11 | 1 | 0.598 | 1     |
| Lysine degradation                                                      | 13 | 1 | 0.66  | 1     |
| Glycerolipid metabolism                                                 | 13 | 1 | 0.66  | 1     |
| Oxidation of branched chain fatty acids                                 | 14 | 1 | 0.687 | 1     |
| Amino sugar metabolism                                                  | 15 | 1 | 0.712 | 1     |
| Fructose and mannose degradation                                        | 18 | 1 | 0.776 | 1     |
| Fatty acid metabolism                                                   | 29 | 1 | 0.912 | 1     |
| Steroid biosynthesis                                                    | 31 | 1 | 0.926 | 1     |
| Tryptophan metabolism                                                   | 34 | 1 | 0.943 | 1     |

### Metabolite Sets Enrichment Overview

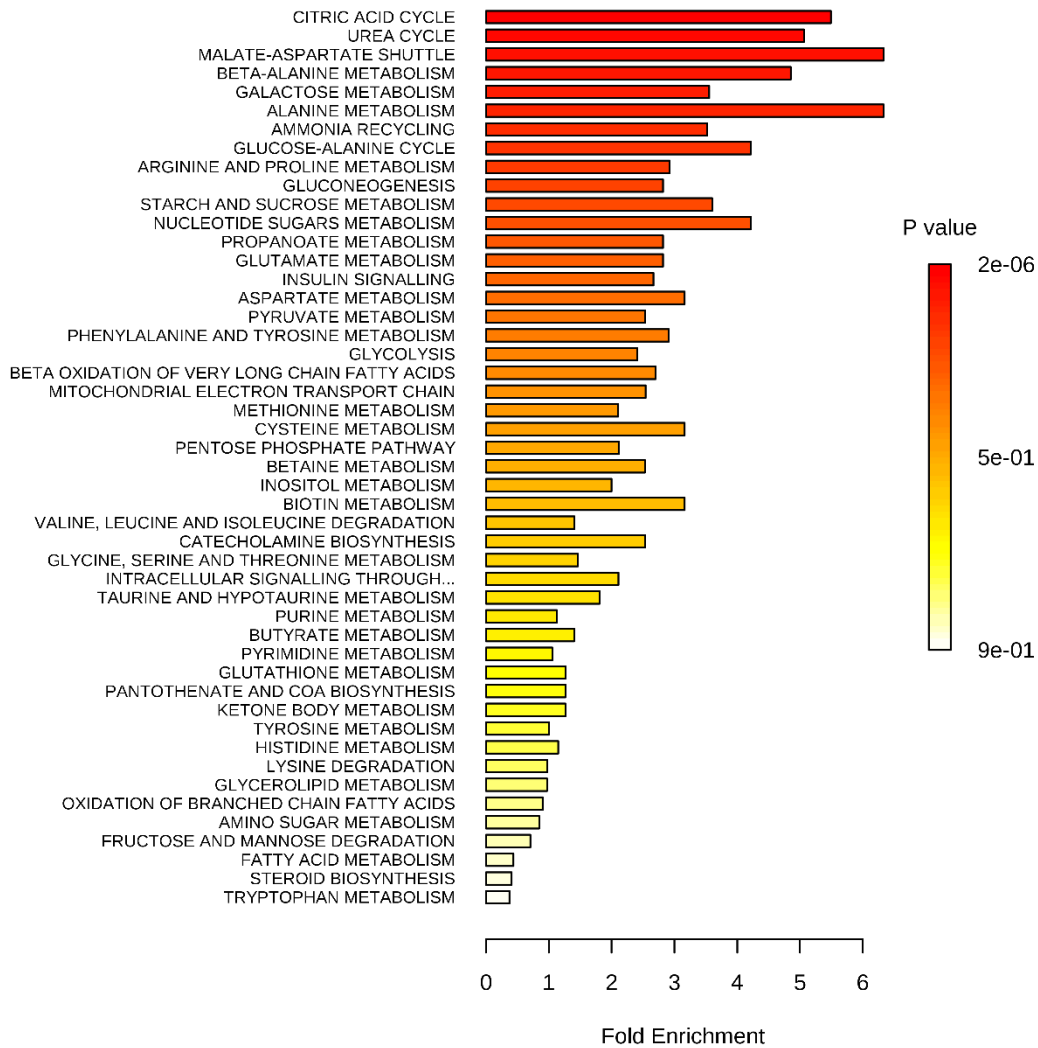

**Figure S6.** Pathway enrichment analysis of metabolites that were significantly linear (including combined rhythmic and linear metabolites) in individual-level analyses. Unadjusted p-values are represented. Generated by MetaboAnalyst 3.0.
